# Supplementary material
Source: publisher site journal article supplement (https://kjim.org/upload/media/kjim-2022-326-Supplementary-Fig-1.pdf)
Supplement: Supplementary file 1 [file kjim-2022-326-Supplementary-Fig-1.pdf]

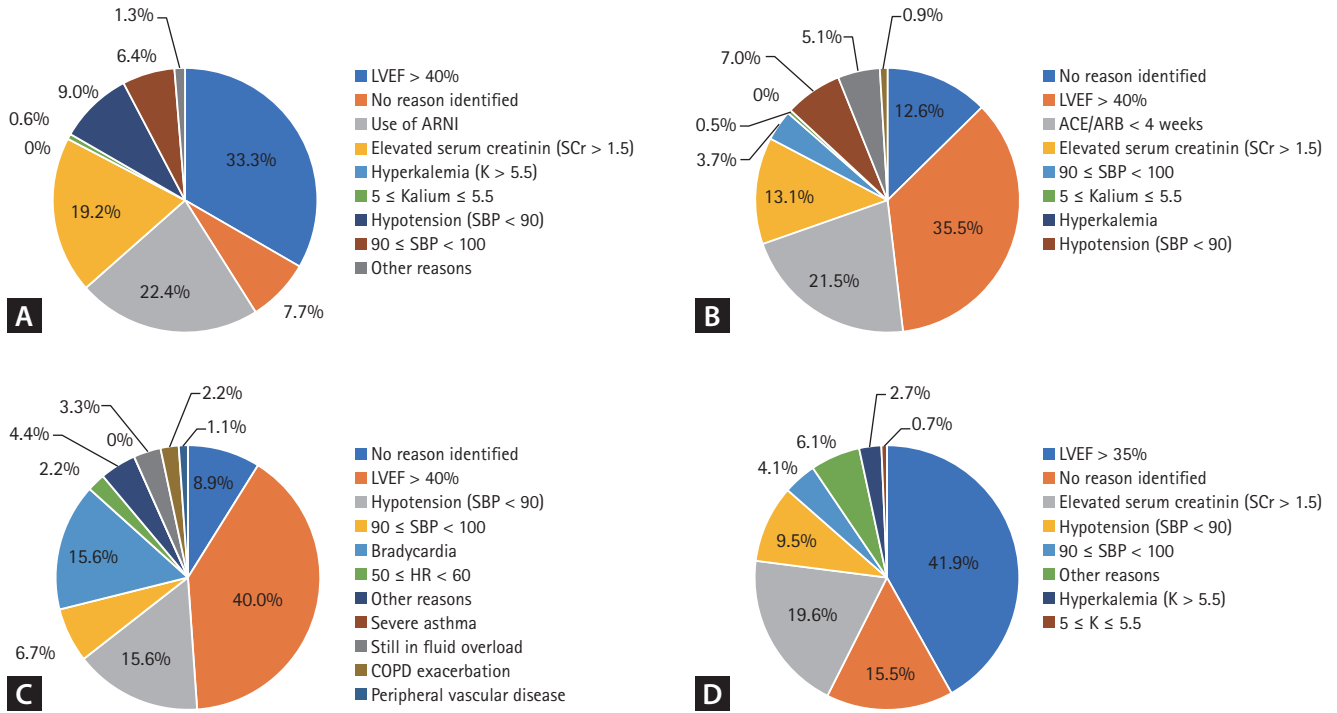

**Supplementary Figure 1.** Reasons for guideline-directed medical therapy (GDMT) non-prescription. (A) Reason for suboptimal prescribed ACEI/ARB. (B) Reason for suboptimal prescription of ARNI. (C) Reasons for suboptimal prescription of beta-blocker. (D) Reasons for suboptimal prescription of MRA. LVEF, left ventricular ejection fraction; SCr, serum creatinine; SBP, systolic blood pressure; ACE, angiotensin converting enzyme; ARB, angiotensin receptor blockers; HR, hazard ratio; COPD, chronic obstructive pulmonary diseases; ACEI, angiotensin-converting enzyme inhibitors; ARNI, angiotensin receptor-neprilysin inhibitor; MRA, mineralocorticoid-receptor-antagonists.
